# Supplementary material for: A dip-stick type biosensor using bioluminescent bacteria encapsulated in color-coded alginate microbeads for detection of water toxicity
Source: Royal Society of Chemistry journal article supplement (doi:10.1039/c4an00308j), 2014-01-01
Supplement: c4an00308j1.pdf [file c4an00308j1.pdf]

## Supplementary Information

### A dip-stick type biosensor using bioluminescent bacteria encapsulated in color-coded alginate microbeads for detection of water toxicity

Insup Jung<sup>a, 1</sup>, Ho Bin Seo<sup>a, 1</sup>, Ji-eun Lee<sup>a</sup>, Byoung Chan Kim<sup>b,\*</sup>, Man Bock Gu<sup>a,\*</sup>

<sup>a</sup>School of Life Sciences and Biotechnology, Korea University, Anam-dong 5 ga, Seongbuk-gu, Seoul 136-701, Republic of Korea

<sup>b</sup>Center for Environment, Health and Welfare Research, Korea Institute of Science and Technology (KIST), Hwarangno 14-gil 5, Seongbuk-gu, Seoul 136-791, Republic of Korea

<sup>1</sup> These authors are equally contributed

\* Corresponding author

Man Bock Gu, Professor

Tel: +82-2-3290-3417

Fax: +82-2-928-6050

E-mail: [mbgu@korea.ac.kr](mailto:mbgu@korea.ac.kr)

Byoung Chan Kim, Ph.D.

Tel: + 82 2 958 5877

Fax: + 82 2 958 5805

E-mail: [bchankim@kist.re.kr](mailto:bchankim@kist.re.kr)

#### Supplementary contents

**Figure S1.** Dose-dependent bioluminescent response induced by 5 different dose of chemical spiked LB medium

**Figure S2.** Pixel intensity of dose-dependent response of 8 bacterial bioluminescence induced by 5 different chemical

**Figure S3.** Pixel intensity of 8 bacterial bioluminescence induced by MMC 2ppm, MNNG 2 ppm, Paraquat 25 ppm, H<sub>2</sub>O<sub>2</sub> 17 ppm and 2,4-DCP 30 ppm.

**Table S1.** The list of biosensors developed in our group using bioluminescent bacteria and their application along with benefits and demerits.

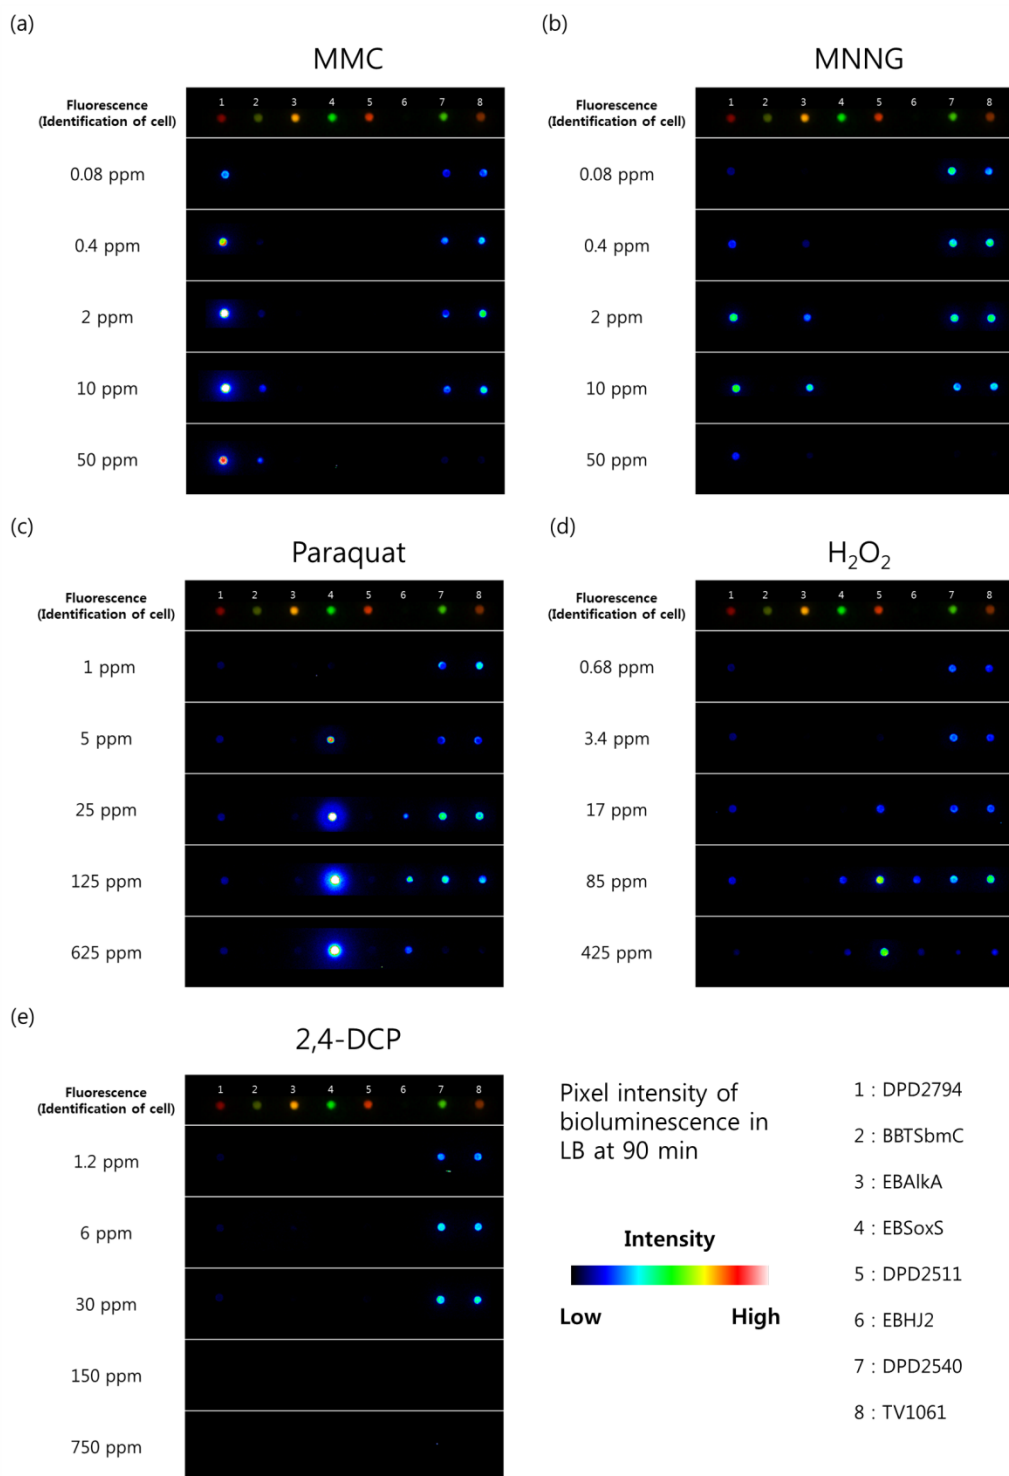

**Figure S1.** Dose-dependent bioluminescent response induced by 5 different dose of chemical spiked LB medium (a) MMC, (b) MNNG, (c) Paraquat, (d) H<sub>2</sub>O<sub>2</sub>, and (e) 2,4-DCP

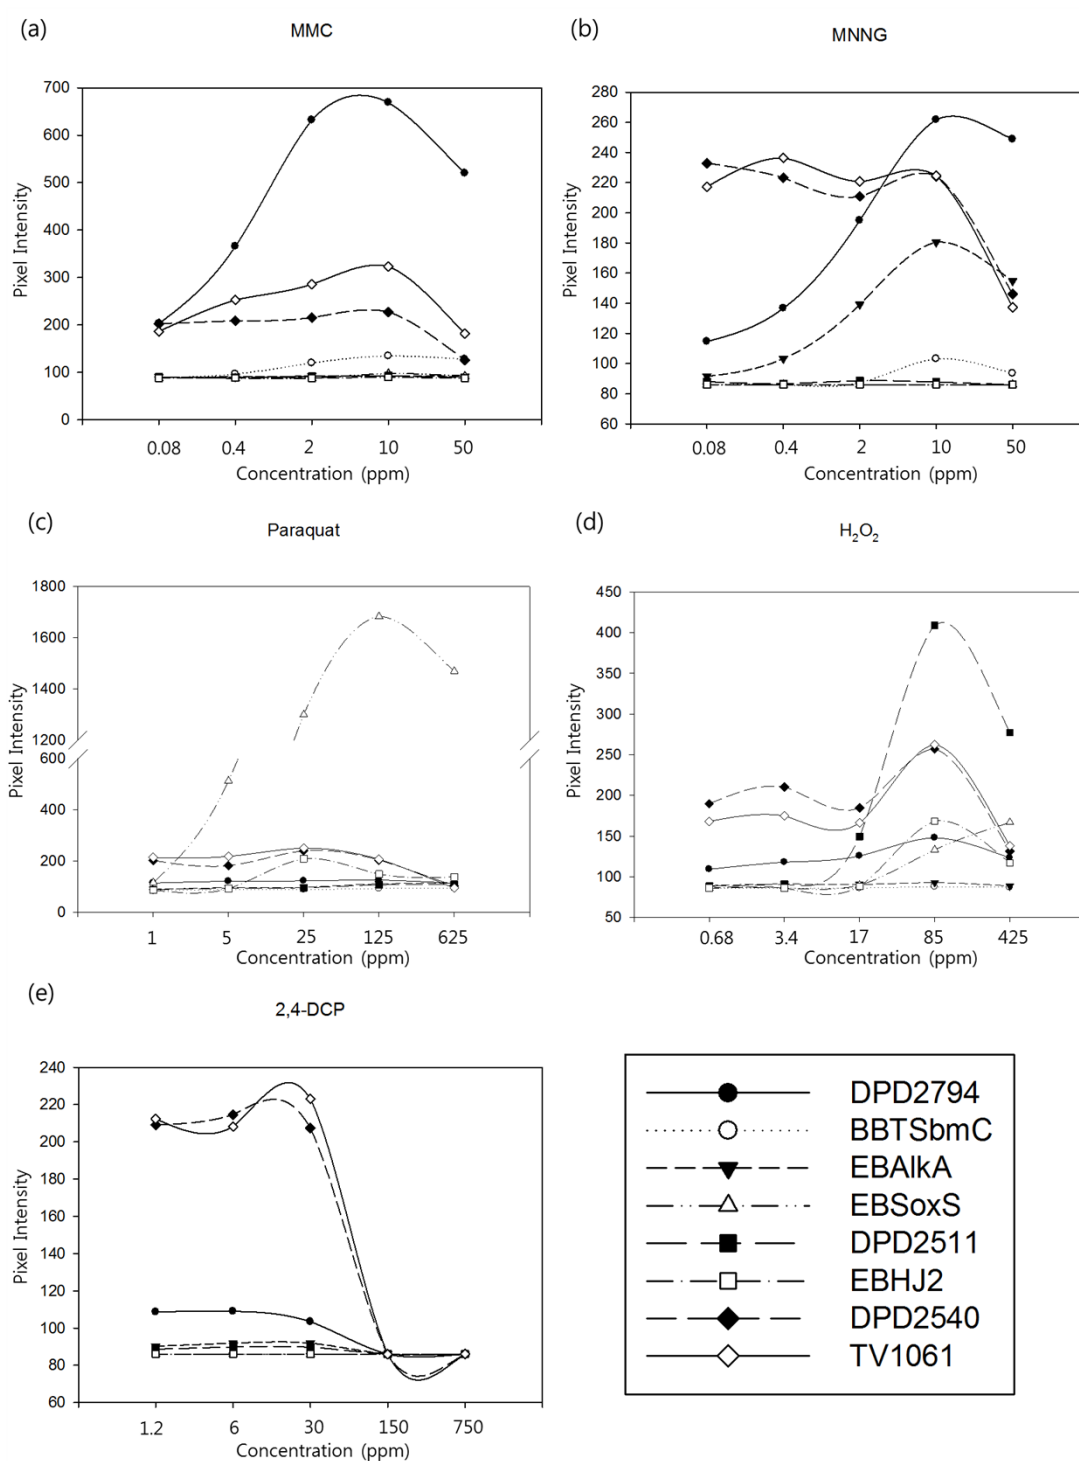

**Figure S2.** Pixel intensity of dose-dependent response of 8 bacterial bioluminescence induced by (a) MMC, (b) MNNG, (c) Paraquat, (d) H<sub>2</sub>O<sub>2</sub> 17, and (e) 2,4-DCP 30

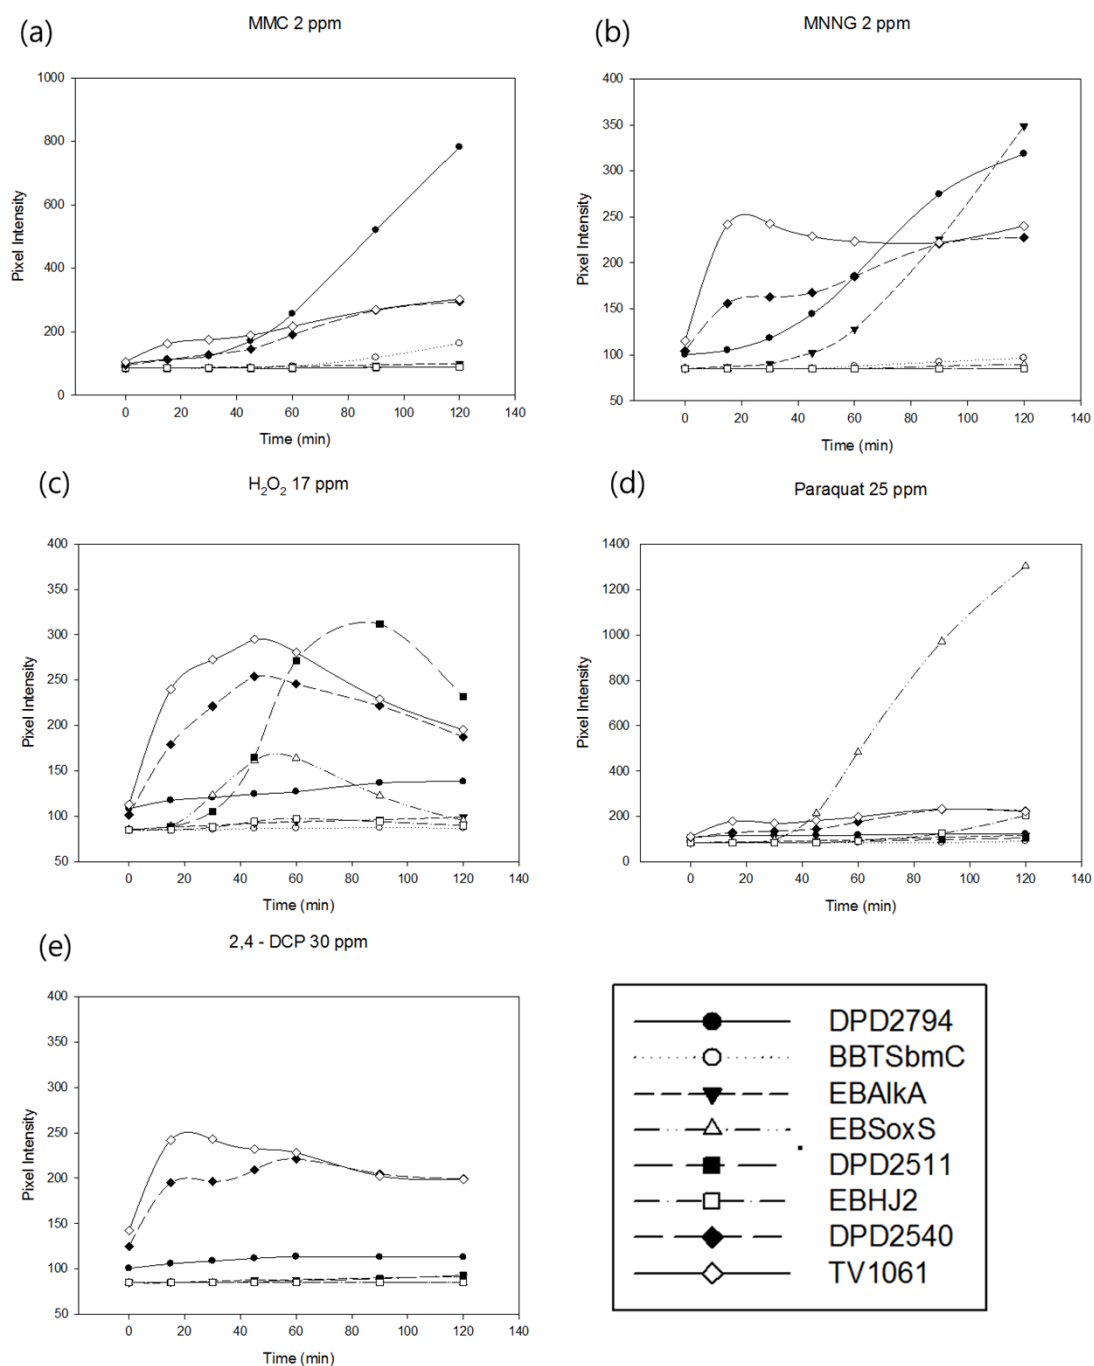

**Figure**

**S3.** Pixel intensity of 8 bacterial bioluminescence induced by (a) MMC 2ppm, (b) MNNG 2 ppm, (c) Paraquat 25 ppm, (d)  $H_2O_2$  17 ppm and (e) 2,4-DCP 30 ppm.

**Table S1.** The list of biosensors developed in our group using bioluminescent bacteria and their application along with benefits and demerits.

| Sensor type                        | Application field                                                                                      | Benefit                                                                            | Demerit                                                         | Reference  |
|------------------------------------|--------------------------------------------------------------------------------------------------------|------------------------------------------------------------------------------------|-----------------------------------------------------------------|------------|
| Multi-channel continuous biosensor | Toxicity monitoring of polluted water                                                                  | Continuous toxicity monitoring                                                     | Fixed sensor on site, and not portable sensor                   | 1          |
| Gas biosensor                      | Toxicity monitoring of gas                                                                             | Highly stable, portable and disposable biosensor                                   | Difficult to discriminate the species of gas                    | 2          |
| Soil biosensor                     | Toxicity monitoring of polycyclic aromatic hydrocarbons (PAHs) contaminated soil                       | Highly stable, portable and disposable biosensor                                   | Difficult to discriminate the species of chemicals contaminated | 3          |
| Cell array biosensors              | High throughput toxicity monitoring and screening for polluted water, food extracts or drug candidates | Fast fabrication of sensor and reduction of cost, time and labor to prepare sensor | One-time diagnosis, not continuous                              | 4, 5       |
| Dip-stick biosensor                | Toxicity diagnosis of water on site                                                                    | Portable and easy to handle for test                                               | One-time diagnosis, not continuous                              | This study |

## References

1. B.C. Kim and M.B. Gu, *Environmental Monitoring and Assessment*, 2005, **109**, 123-133.
2. G.C. Gil, R.J. Mitchell, S.T. Chang and M.B. Gu, *Biosensors and Bioelectronics*, 2000, **15**, 23-30
3. M.B. Gu and S.T. Chang, *Biosensors and Bioelectronics*, 2001, **16**, 667-674
4. J.H. Lee, C.H. Yoon, B.C. Kim, M.B. Gu, 2007, *Biosensors and Bioelectronics*, **22**, 2223-2229.
5. J.M. Ahn, J.H. Kim, J.H. Kim and M.B. Gu, *Lab on a Chip*, 2010, **10**, 2695-2701.
